# Supplementary material for: Blood expression of NADK2 as a diagnostic biomarker for sciatica
Source: PubMed Central journal article supplement — iScience. 2024 Oct 18;27(11):111196. doi: 10.1016/j.isci.2024.111196 (PMC11576402; doi:10.1016/j.isci.2024.111196), 2024-10-18
Supplement: mmc1.pdf [file mmc1.pdf]

iScience, Volume 27

## **Supplemental information**

### **Blood expression of NADK2 as a diagnostic biomarker for sciatica**

**Xiaobo Wang, Zhenxiao Ren, Bingyu Wang, Jiawei Shi, Jingmin Liu, Yang Wang, and Xin Zheng**

Table S1 The logFC and pvalue of inter differentially expressed genes in GSE124272 and GSE150408.

| gene_symbol    | GSE150408 |        | GSE124272 |        |
|----------------|-----------|--------|-----------|--------|
|                | logFC     | pvalue | logFC     | pvalue |
| lnc-IFNG-3     | 0.39      | 0.04   | 0.75      | 0.01   |
| NADK2          | 0.83      | 0.00   | 0.34      | 0.03   |
| TAS2R14        | 0.54      | 0.03   | 0.36      | 0.04   |
| DUSP26         | -0.63     | 0.01   | -0.94     | 0.00   |
| ZNF185         | -0.32     | 0.04   | -0.63     | 0.00   |
| lnc-PHOX2B-2   | -0.49     | 0.04   | -0.67     | 0.01   |
| XLOC_l2_015121 | -0.56     | 0.02   | -0.82     | 0.01   |
| LOC101927636   | -0.72     | 0.04   | -1.33     | 0.01   |
| PBX1           | -0.48     | 0.04   | -0.96     | 0.02   |
| RGS18          | -0.36     | 0.01   | -0.43     | 0.04   |

Table S2. The LASSO coefficients in the combined dataset of GSE124272 and GSE150408

| variable       | $\lambda$ (min) |
|----------------|-----------------|
| (Intercept)    | -1.5595345      |
| lnc-IFNG-3     | 0               |
| NADK2          | 0.31693557      |
| TAS2R14        | 0               |
| DUSP26         | 0               |
| ZNF185         | 0               |
| lnc-PHOX2B-2   | 0               |
| XLOC_l2_015121 | 0               |
| LOC101927636   | 0               |
| PBX1           | 0               |
| RGS18          | 0               |

Table S3. The LASSO coefficients in the 200 clinical cases

| variable            | $\lambda$ (min) |
|---------------------|-----------------|
| (Intercept)         | 11.1198894      |
| sex                 | 0               |
| age                 | 0               |
| BMI                 | 0               |
| smoking             | 0               |
| osteoarthritis pain | 0               |
| NADK2-actin         | -1.314276       |

Table S4. The GSEA results in GSE124272 using differentially expressed genes stratified by NADK2 expression

| Pathway | setSize | enrichmentScore | NES | pvalue | p.adjust | qvalue |
|---------|---------|-----------------|-----|--------|----------|--------|
|---------|---------|-----------------|-----|--------|----------|--------|

|                                             |     |       |       |       |       |       |
|---------------------------------------------|-----|-------|-------|-------|-------|-------|
| Aminoacyl-tRNA biosynthesis                 | 25  | 0.65  | 1.93  | 0.000 | 0.003 | 0.003 |
| N-Glycan biosynthesis                       | 53  | 0.56  | 2.00  | 0.000 | 0.001 | 0.001 |
| ATP-dependent chromatin remodeling          | 88  | 0.44  | 1.69  | 0.001 | 0.014 | 0.011 |
| Protein processing in endoplasmic reticulum | 162 | 0.34  | 1.47  | 0.005 | 0.040 | 0.032 |
| Herpes simplex virus 1 infection            | 488 | 0.31  | 1.49  | 0.000 | 0.001 | 0.001 |
| Olfactory transduction                      | 396 | -0.32 | -1.48 | 0.000 | 0.003 | 0.003 |

Table S5. The GSEA results in GSE150408 using differentially expressed genes stratified by NADK2 expression

| Pathway                                     | setSize | enrichmentScore | NES   | pvalue | p.adjust | qvalue |
|---------------------------------------------|---------|-----------------|-------|--------|----------|--------|
| Aminoacyl-tRNA biosynthesis                 | 25      | 0.64            | 1.93  | 0.000  | 0.006    | 0.005  |
| N-Glycan biosynthesis                       | 53      | 0.51            | 1.83  | 0.000  | 0.007    | 0.006  |
| ATP-dependent chromatin remodeling          | 88      | 0.41            | 1.65  | 0.001  | 0.020    | 0.017  |
| Protein processing in endoplasmic reticulum | 162     | 0.38            | 1.67  | 0.000  | 0.005    | 0.004  |
| Herpes simplex virus 1 infection            | 488     | 0.35            | 1.69  | 0.000  | 0.000    | 0.000  |
| Olfactory transduction                      | 396     | -0.37           | -1.83 | 0.000  | 0.000    | 0.000  |

Table S6. The GSEA results in GSE124272 & GSE150408 using differentially expressed genes stratified by NADK2 expression

| Pathway                                     | setSize | enrichmentScore | NES   | pvalue | p.adjust | qvalue |
|---------------------------------------------|---------|-----------------|-------|--------|----------|--------|
| Aminoacyl-tRNA biosynthesis                 | 25      | 0.71            | 2.18  | 0.000  | 0.000    | 0.000  |
| N-Glycan biosynthesis                       | 53      | 0.57            | 2.06  | 0.000  | 0.000    | 0.000  |
| ATP-dependent chromatin remodeling          | 88      | 0.53            | 2.09  | 0.000  | 0.000    | 0.000  |
| Protein processing in endoplasmic reticulum | 162     | 0.43            | 1.84  | 0.000  | 0.000    | 0.000  |
| Herpes simplex virus 1 infection            | 488     | 0.38            | 1.86  | 0.000  | 0.000    | 0.000  |
| Olfactory transduction                      | 396     | -0.39           | -1.93 | 0.000  | 0.000    | 0.000  |
